# Supplementary material for: Arthropods in Two Organic Agro-Ecosystems; Biodiversity, Distribution, and Weeds Impacts
Source: Preprints.org preprint supplement (doi:10.20944/preprints202202.0190.v1), 2022-02-16
Supplement: Supplementary file 1 [file supplementary]

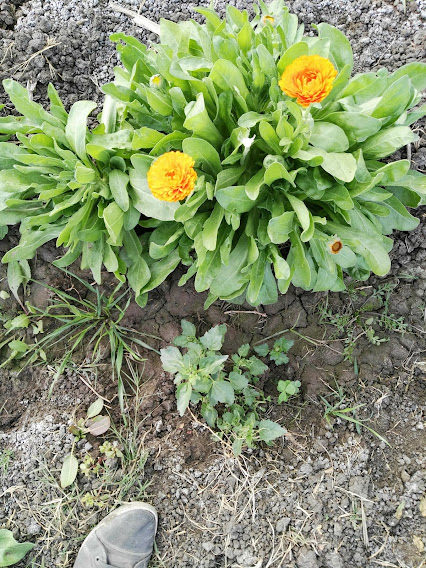

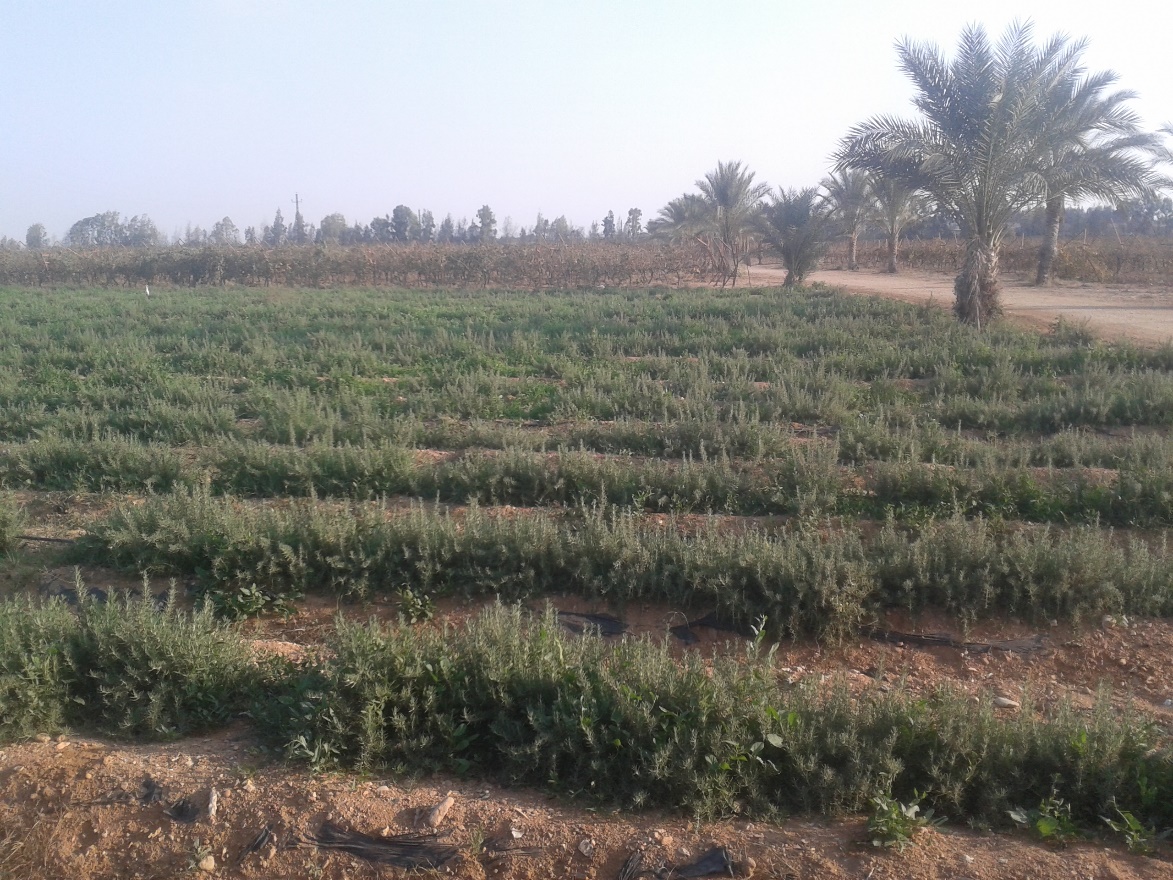


Appendix 1. Rosemary plot, with interaction with weeds, SEKEM farm.

Appendix 2. Calendula and weeds, Shampoliah farm.


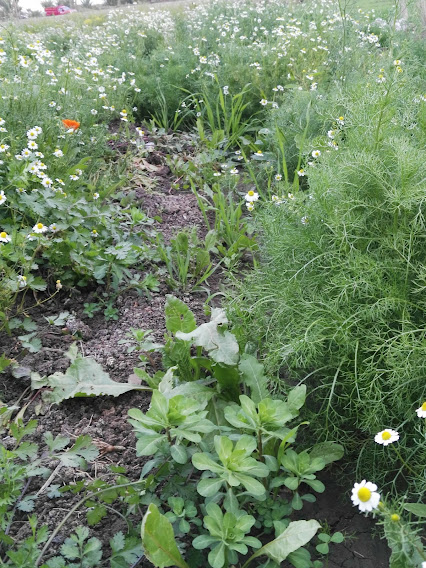


Appendix 3. Chamomile field with different weed plants, Shampoliah farm.
